# Supplementary material
Source: Research Square preprint supplement (doi:10.21203/rs.3.rs-10028847/v1)
Supplement: Supplementary file 1 [file a52e5721ecefa449eda4d6eb.docx]

Flavour Analysis of Control at 24hr

Data Path : C:\msdchem\1\methods\OldMethods\new scan.M\

Data File : CONTROL 24 HOUR.D

Acq On : 21 Nov 2019 12:15

Operator :

Sample : CONTROL 24 HOUR

Misc :

ALS Vial : 1 Sample Multiplier: 1

Search Libraries: C:\Database\NIST14.L Minimum Quality: 90

Unknown Spectrum: Apex

Integration Events: ChemStation Integrator - events.e

Pk# RT Area% Library/ID Ref# CAS# Qual

_____________________________________________________________________________

1 14.558 10.63 C:\Database\NIST14.L

Hexadecanoic acid, methyl ester 130820 000112-39-0 98

Hexadecanoic acid, methyl ester 130813 000112-39-0 98

Pentadecanoic acid, 14-methyl-, me 130841 005129-60-2 97

thyl ester

2 14.944 11.78 C:\Database\NIST14.L

n-Hexadecanoic acid 117418 000057-10-3 99

n-Hexadecanoic acid 117417 000057-10-3 99

n-Hexadecanoic acid 117419 000057-10-3 99

3 15.944 19.19 C:\Database\NIST14.L

9,12-Octadecadienoic acid, methyl 153873 002462-85-3 99

ester

9,12-Octadecadienoic acid (Z,Z)-, 153891 000112-63-0 99

methyl ester

10,13-Octadecadienoic acid, methyl 153881 056554-62-2 99

ester

4 16.016 16.11 C:\Database\NIST14.L

9-Octadecenoic acid, methyl ester, 155758 001937-62-8 99

(E)-

11-Octadecenoic acid, methyl ester 155737 052380-33-3 99

9-Octadecenoic acid (Z)-, methyl e 155750 000112-62-9 99

ster

5 16.049 1.02 C:\Database\NIST14.L

9-Octadecenoic acid (Z)-, methyl e 155751 000112-62-9 99

ster

cis-13-Octadecenoic acid, methyl e 155747 1000333-58-3 98

ster

10-Octadecenoic acid, methyl ester 155731 013481-95-3 97

6 16.225 3.85 C:\Database\NIST14.L

Methyl stearate 157879 000112-61-8 98

Methyl stearate 157880 000112-61-8 97

Methyl stearate 157884 000112-61-8 97

7 16.397 23.08 C:\Database\NIST14.L

Oleic Acid 142071 000112-80-1 99

Oleic Acid 142072 000112-80-1 99

6-Octadecenoic acid, (Z)- 142084 000593-39-5 97

8 16.563 3.56 C:\Database\NIST14.L

Octadecanoic acid 144268 000057-11-4 90

Octadecanoic acid 144270 000057-11-4 70

1-Eicosanol 158030 000629-96-9 43

Signal : TIC: CONTROL 24 HOUR.D\data.ms

peak R.T. first max last PK peak corr. corr. % of

# min scan scanscan TY height area % max. total

--- ----- ----- ---- ---- --- ------- ------- ------ -------

1 14.559 2398 2409 2422 BB 13240142 221357991 46.06% 10.631%

2 14.944 2462 2490 2511 BB 6487404 245342870 51.05% 11.783%

3 15.946 2682 2700 2706 BV 17505825 399509165 83.12% 19.187%

4 16.017 2706 2715 2720 VV 18042876 335521564 69.81% 16.114%

5 16.048 2720 2722 2731 VV 1944905 21138927 4.40% 1.015%

6 16.226 2745 2759 2765 BV 4706262 80199362 16.69% 3.852%

7 16.395 2765 2795 2818 VV 4 7718697 480616520 100.00% 23.083%

8 16.565 2818 2830 2840 VV 7 2172633 74204162 15.44% 3.564%

Sum of corrected areas: 2082158520

newscan.M Wed Nov 27 12:15:52 2019

Flavour Analysis of Control at 72hrs

Data Path : C:\msdchem\1\methods\OldMethods\new scan.M\

Data File : CONTROL 72HOURS.

Acq On : 21 Nov 2019 12:15

Operator :

Sample : CONTROL 72 HOUR

Misc :

ALS Vial : 1 Sample Multiplier: 1

Search Libraries: C:\Database\NIST14.L Minimum Quality: 90

Unknown Spectrum: Apex

Integration Events: ChemStation Integrator - events.e

Pk# RT Area% Library/ID Ref# CAS# Qual

_____________________________________________________________________________

1 14.558 10.63 C:\Database\NIST14.L

Hexadecanoic acid, methyl ester 130820 000112-39-0 98

Hexadecanoic acid, methyl ester 130813 000112-39-0 98

Pentadecanoic acid, 14-methyl-, me 130841 005129-60-2 97

thyl ester

2 14.944 11.78 C:\Database\NIST14.L

n-Hexadecanoic acid 117418 000057-10-3 99

n-Hexadecanoic acid 117417 000057-10-3 99

n-Hexadecanoic acid 117419 000057-10-3 99

3 15.944 19.19 C:\Database\NIST14.L

9,12-Octadecadienoic acid, methyl 153873 002462-85-3 99

ester

9,12-Octadecadienoic acid (Z,Z)-, 153891 000112-63-0 99

methyl ester

10,13-Octadecadienoic acid, methyl 153881 056554-62-2 99

ester

4 16.016 16.11 C:\Database\NIST14.L

9-Octadecenoic acid, methyl ester, 155758 001937-62-8 99

(E)-

11-Octadecenoic acid, methyl ester 155737 052380-33-3 99

9-Octadecenoic acid (Z)-, methyl e 155750 000112-62-9 99

ster

5 16.049 1.02 C:\Database\NIST14.L

9-Octadecenoic acid (Z)-, methyl e 155751 000112-62-9 99

ster

cis-13-Octadecenoic acid, methyl e 155747 1000333-58-3 98

ster

10-Octadecenoic acid, methyl ester 155731 013481-95-3 97

6 16.225 3.85 C:\Database\NIST14.L

Methyl stearate 157879 000112-61-8 98

Methyl stearate 157880 000112-61-8 97

Methyl stearate 157884 000112-61-8 97

7 16.397 23.08 C:\Database\NIST14.L

Oleic Acid 142071 000112-80-1 99

Oleic Acid 142072 000112-80-1 99

6-Octadecenoic acid, (Z)- 142084 000593-39-5 97

8 16.563 3.56 C:\Database\NIST14.L

Octadecanoic acid 144268 000057-11-4 90

Octadecanoic acid 144270 000057-11-4 70

1-Eicosanol 158030 000629-96-9 43

9 16.644 1.08 C:\Database\NIST14.L

9,12-Octadecadienoic acid (Z,Z)- 140137 000060-33-3 98

Linoelaidic acid 140124 000506-21-8 97

9,12-Octadecadienoic acid (Z,Z)- 140138 000060-33-3 96

10 17.387 1.15 C:\Database\NIST14.L

cis-5-Dodecenoic acid 63236 002430-94-6 78

Undecylenic acid 50965 000112-38-9 43

Oxacyclotridecan-2-one 63246 000947-05-7 41

11 17.758 0.95 C:\Database\NIST14.L

Methyl 18-methylnonadecanoate 184595 1000352-20-6 96

Eicosanoic acid, methyl ester 184599 001120-28-1 95

Tetradecanoic acid, 12-methyl-, me 117491 062691-05-8 87

thyl ester, (S)-

12 18.597 0.41 C:\Database\NIST14.L

9,12-Octadecadienoic acid (Z,Z)- 140137 000060-33-3 95

9,17-Octadecadienal, (Z)- 125003 056554-35-9 90

Cyclopropaneoctanal, 2-octyl- 140252 056196-06-6 89

13 19.673 1.34 C:\Database\NIST14.L

9,17-Octadecadienal, (Z)- 125003 056554-35-9 94

9,12-Octadecadienoic acid (Z,Z)- 140137 000060-33-3 92

9-Tetradecenal, (Z)- 74485 053939-27-8 90

14 20.644 5.84 C:\Database\NIST14.L

Oxalic acid, allyloctadecyl ester 228424 1000309-24-5 38

Ethanol, 2-(tetradecyloxy)- 119375 002136-70-1 38

Oxalic acid, allylhexadecyl ester 208779 1000309-24-4 38

newscan.M Wed Nov 27 11:57:20 2019

Data Path : C:\msdchem\1\methods\OldMethods\new scan.M\

Data File : CONTROL 0 HOUR.D

Acq On : 21 Nov 2019 12:15

Operator :

Sample : CONTROL 0 HOUR

Misc :

ALS Vial : 1 Sample Multiplier: 1

Integration Parameters: events.e

Integrator: ChemStation

Method : C:\msdchem\1\methods\OldMethods\new scan.M

Title :

Signal : TIC: CONTROL 0 HOUR.D\data.ms

peak R.T. first max last PK peak corr. corr. % of

# min scan scanscan TY height area % max. total

--- ----- ----- ---- ---- --- ------- ------- ------ -------

1 14.559 2398 2409 2422 BB 13240142 221357991 46.06% 10.631%

2 14.944 2462 2490 2511 BB 6487404 245342870 51.05% 11.783%

3 15.946 2682 2700 2706 BV 17505825 399509165 83.12% 19.187%

4 16.017 2706 2715 2720 VV 18042876 335521564 69.81% 16.114%

5 16.048 2720 2722 2731 VV 1944905 21138927 4.40% 1.015%

6 16.226 2745 2759 2765 BV 4706262 80199362 16.69% 3.852%

7 16.395 2765 2795 2818 VV 4 7718697 480616520 100.00% 23.083%

8 16.565 2818 2830 2840 VV 7 2172633 74204162 15.44% 3.564%

9 16.644 2840 2847 2866 VB 6 640041 22442919 4.67% 1.078%

10 17.388 2983 3003 3008 BV 1154546 23958393 4.98% 1.151%

11 17.756 3062 3081 3087 PV 1451159 19850480 4.13% 0.953%

12 18.596 3252 3257 3261 VV 697303 8559544 1.78% 0.411%

13 19.673 3468 3483 3498 BV 4 795151 27884734 5.80% 1.339%

14 20.646 3627 3687 3738 BV 6 1069112 121571887 25.29% 5.839%

Sum of corrected areas: 2082158520

newscan.M Wed Nov 27 12:15:52 2019

Flavour Analysis of Sample A Isolate A at 72hr

Data Path : C:\msdchem\1\methods\OldMethods\new scan.M\

Data File : SAMPLE A ISOLATE A 72 HOURS.D

Acq On : 21 Nov 2019 12:42

Operator :

Sample : SAMPLE A ISOLATE A 72 HOURS

Misc :

ALS Vial : 2 Sample Multiplier: 1

Search Libraries: C:\Database\NIST14.L Minimum Quality: 90

Unknown Spectrum: Apex

Integration Events: ChemStation Integrator – events.e

Pk# RT Area% Library/ID Ref# CAS# Qual

1 11.801 2.80 C:\Database\NIST14.L

2(3H)-Furanone, dihydro-5-(2-octen 61594 018679-18-0 87

yl)-, (Z)-

2(3H)-Furanone, dihydro-5-(2-octen 61593 018679-18-0 72

yl)-, (Z)-

Octanamide, N-(2-hydroxyethyl)- 53610 007112-02-9 72

2 12.044 3.14 C:\Database\NIST14.L

.gamma.-Dodecalactone 63237 002305-05-7 90

2(3H)-Furanone, 5-hexyldihydro- 39635 000706-14-9 72

2(3H)-Furanone, 5-heptyldihydro- 51029 000104-67-6 72

3 14.554 5.68 C:\Database\NIST14.L

Pentadecanoic acid, 14-methyl-, me 130841 005129-60-2 98

thyl ester

Hexadecanoic acid, methyl ester 130822 000112-39-0 97

Hexadecanoic acid, methyl ester 130818 000112-39-0 97

4 14.920 13.18 C:\Database\NIST14.L

n-Hexadecanoic acid 117417 000057-10-3 99

n-Hexadecanoic acid 117419 000057-10-3 99

n-Hexadecanoic acid 117418 000057-10-3 97

5 15.920 8.83 C:\Database\NIST14.L

10,13-Octadecadienoic acid, methyl 153881 056554-62-2 99

ester

Methyl 10-trans,12-cis-octadecadie 153874 1000336-44-2 99

noate

9,12-Octadecadienoic acid (Z,Z)- 140138 000060-33-3 99

6 15.997 8.04 C:\Database\NIST14.L

11-Octadecenoic acid, methyl ester 155737 052380-33-3 99

9-Octadecenoic acid, methyl ester, 155754 001937-62-8 99

(E)-

8-Octadecenoic acid, methyl ester, 155753 026528-50-7 99

(E)-

7 16.225 2.94 C:\Database\NIST14.L

Methyl stearate 157879 000112-61-8 97

Heptadecanoic acid, 16-methyl-, me 157955 005129-61-3 96

thyl ester

Methyl stearate 157880 000112-61-8 96

8 16.340 22.87 C:\Database\NIST14.L

9,12-Octadecadienoic acid (Z,Z)- 140138 000060-33-3 99

9,12-Octadecadienoic acid (Z,Z)- 140137 000060-33-3 99

Linoelaidic acid 140124 000506-21-8 99

9 16.397 17.95 C:\Database\NIST14.L

Oleic Acid 142071 000112-80-1 99

Oleic Acid 142072 000112-80-1 98

6-Octadecenoic acid, (Z)- 142084 000593-39-5 96

10 16.559 3.16 C:\Database\NIST14.L

Octadecanoic acid 144270 000057-11-4 95

Octadecanoic acid 144268 000057-11-4 90

1,11-Dodecadiene 36574 005876-87-9 80

11 17.387 0.30 C:\Database\NIST14.L

cis-5-Dodecenoic acid 63236 002430-94-6 64

Oxacyclotridecan-2-one 63246 000947-05-7 55

cis-Vaccenic acid 142073 000506-17-2 49

12 19.668 2.36 C:\Database\NIST14.L

9,17-Octadecadienal, (Z)- 125003 056554-35-9 95

cis-9-Hexadecenal 100560 056219-04-6 90

9-Octadecenal, (Z)- 126829 002423-10-1 83

13 20.363 8.75 C:\Database\NIST14.L

9,17-Octadecadienal, (Z)- 125003 056554-35-9 92

9,12-Octadecadien-1-ol, (Z,Z)- 126846 000506-43-4 59

Oleic Acid 142071 000112-80-1 52

newscan.M Wed Nov 27 13:23:42 2019

Data Path : C:\msdchem\1\methods\OldMethods\new scan.M\

Data File : SAMPLE A ISOLATE A 72 HOURS.D

Acq On : 21 Nov 2019 12:42

Operator :

Sample : SAMPLE A ISOLATE A 72 HOURS

Misc :

ALS Vial : 2 Sample Multiplier: 1

Integration Parameters: events.e

Integrator: ChemStation

Method : C:\msdchem\1\methods\OldMethods\new scan.M

Title :

Signal : TIC: SAMPLE A ISOLATE A 72 HOURS.D\data.ms

peak R.T. first max last PK peak corr. Corr. % of

# min scan scanscan TY height area % max. total

--- ----- ----- ---- ---- --- ------- ------- ------ -------

1 11.802 1804 1830 1854 BV 1202615 34250018 12.24% 2.798%

2 12.046 1869 1881 1909 BB 1289189 38468384 13.74% 3.143%

3 14.553 2394 2408 2420 BB 4344690 69535847 24.84% 5.681%

4 14.921 2464 2485 2510 BB 5305942 161274084 57.61% 13.177%

5 15.921 2662 2695 2703 BV 6674519 108054764 38.60% 8.829%

6 15.996 2703 2711 2717 VV 6000313 98402006 35.15% 8.040%

7 16.223 2730 2759 2763 PV 2115782 36016971 12.87% 2.943%

8 16.341 2763 2783 2788 VV 2 6245945 279934242 100.00% 22.872%

9 16.396 2788 2795 2818 VV 6765600 219692484 78.48% 17.950%

10 16.556 2818 2829 2840 VV 8 1352281 38622536 13.80% 3.156%

11 17.389 2979 3003 3007 BV 683299 3732015 1.33% 0.305%

12 19.670 3460 3482 3499 BV 5 828738 28834544 10.30% 2.356%

13 20.365 3584 3628 3664 VV 8 951467 107087637 38.25% 8.750%

Sum of corrected areas: 1223905530

newscan.M Wed Nov 27 13:24:09 2019

Flavour Analysis of Sample A Isolate A at 72hr

Falvour Analysis of Sample A Isolate C at 24hr

Falvour Analysis of Sample A Isolate C at 24hr

Flavour Analysis of Sample A Isolate B at 24hr

Flavour Analysis of Sample A Isolate B at 72hr

Flavour Analysis of Sample B Isolate B at 24hr

Flavour Analysis of Sample B Isolate B at 72hr

Flavour Analysis of Sample B Isolate C at 24hr

Flavour Analysis of Sample B Isolate C at 72hr

Flavour Analysis of Sample C Isolate A at 24hr

Flavour Analysis of Sample C Isolate A at 72hr

Flavour Analysis of Sample C Isolate B at 24hr

Flavour Analysis of Sample C Isolate C at 72hr
